# Supplementary material for: Novel dopant-free hole transport materials enabling 20.9% efficiency in perovskite solar cells
Source: Royal Society of Chemistry journal article supplement (doi:10.1039/d2cc02346f), 2022-01-01
Supplement: d2cc02346f1.pdf [file d2cc02346f1.pdf]

## Electronic Supporting Information

### **Novel dopant-free hole transport materials enabling 20.9% efficiency perovskite solar cells**

*Xinxing Yin,\*<sup>a</sup> Jiaxing Song,<sup>a</sup> Lin Hu,<sup>a</sup> Yingzhi Jin,<sup>a</sup> Lei Lu,<sup>b</sup> Zhen Su<sup>a</sup> and Zaifang Li\*<sup>a</sup>*

Dr. Xinxing Yin, Dr. Jiaxing Song, Dr. Lin Hu, Dr. Yingzhi Jin, Dr. Zhen Su, Prof. Zaifang Li

China-Australia Institute for Advanced Materials and Manufacturing (IAMM),  
Jiaxing University, Jiaxing 314001, China.

E-mails: xxyin@zjxu.edu.cn; zaifang.li@zjxu.edu.cn

Dr. Lei Lu

College of Biological, Chemical Science and Chemical Engineering, Jiaxing  
University, Jiaxing 314001, China.

\*Corresponding Authors

### **Contents**

|                                                                          |     |
|--------------------------------------------------------------------------|-----|
| 1. Experimental section.....                                             | S2  |
| 2. Synthesis.....                                                        | S3  |
| 3. Device fabrication.....                                               | S6  |
| 4. <sup>1</sup> H NMR, <sup>13</sup> C NMR and MALDI-TOF MS spectra..... | S7  |
| 5. DFT calculation.....                                                  | S11 |
| 6. CV, AFM, SEM and water contact angle results.....                     | S12 |
| 7. Device parameters.....                                                | S14 |
| 8. A summary of representative D-A-D type HTMs.....                      | S15 |
| 9. References.....                                                       | S15 |

## 1. Experimental section

$^1\text{H}$  and  $^{13}\text{C}$  NMR spectra were recorded with Bruker Avance III 500 (500 MHz) spectrometer at room temperature. Mass spectra were obtained by Bruker ultrafleXtreme MALDITOF/TOF. The absorption spectra were measured on a UV-Vis spectrophotometer (Cary 5000, Agilent). The electrochemical cyclic voltammetry (CV) was conducted on an electrochemical workstation (CHI660D Chenhua, Shanghai) with Pt plate as working electrode, Pt slice as counter electrode, and Ag/AgCl electrode as reference electrode in tetrabutylammonium hexafluorophosphate ( $n\text{-Bu}_4\text{NPF}_6$ , 0.1 M) acetonitrile solutions at a scan rate of  $50\text{ mV s}^{-1}$ . HTM films are coated on Pt plate electrode for CV, they keep solid film state during the test. Ferrocene/ferrocenium ( $\text{Fc}/\text{Fc}^+$ ) was used as the internal standard (the energy level of  $\text{Fc}/\text{Fc}^+$  is  $-4.8\text{ eV}$  under vacuum). The HOMO energy level was determined from the calibrated onset oxidation ( $E_{\text{onset}}^{\text{ox}}$ ) as  $\text{HOMO} = -4.8 - E_{\text{onset}}^{\text{ox}}$  (eV); while the LUMO energy level was calculated with HOMO and optical bandgap ( $E_g$ ) by the formula as:  $\text{LUMO} = \text{HOMO} + E_g$  (eV). Thermogravimetric analysis (TGA) was conducted under  $\text{N}_2$  atmosphere at a heating rate of  $20\text{ }^\circ\text{C min}^{-1}$  from  $50\text{ }^\circ\text{C}$  to  $800\text{ }^\circ\text{C}$ . The instrument type was SAT-409PC (NETZSH). DSC was conducted on DSC-200PC (NETZSH) at a scan rate of  $10\text{ }^\circ\text{C min}^{-1}$  from  $50\text{ }^\circ\text{C}$  to  $250\text{ }^\circ\text{C}$ . The UPS spectra were performed using HeI  $21.22\text{ eV}$  as exciting source with energy resolution of  $50\text{ meV}$ . Work function was derived from the secondary electron cut-off and the ionization potential from the frontier edge of the occupied density of states. The spectra were calibrated by referencing to the Fermi level of the  $\text{Ar}^+$  ion sputter-clean Au substrate. The thickness of films were measured from the stylus profiler (Dektak XT, Bruker).

All calculations were performed using Density Functional Theory (DFT) established in Gaussian16 code. The hybrid functional B3LYP/6-31g (d, p) was used for basic optimization and B3LYP/6-311g (d, p) was used for further electrostatic surface potential simulation.

TRPL measurements were conducted similarly as described in our earlier works.<sup>1</sup> PL decay curves were biexponential in nature and fitted by iterative re-convolution with the measured system response function. Mean photogenerated carrier lifetimes for the biexponential fit are calculated by the weighted average method.  $J-V$  curves were measured in air under  $100\text{ mW cm}^{-2}$  AM1.5G solar irradiation (Enli technology co., ltd) with a Keithley 2400 Source Meter. The incident light was controlled by a shutter. The steady-state efficiencies were obtained by tracking the maximum output power point.

EQE spectra were performed on a QE system (QE-R, Enli technology co., ltd) using 100 Hz chopped monochromatic light ranging from 300 to 850 nm under near-dark test conditions. All characterizations and measurements were performed in the ambient.

Hole-only devices with the configuration of ITO/PEDOT:PSS/HTM/Au were used to evaluate charge mobilities by space charge-limited currents (SCLC) model. We didn't do any thermal annealing to HTM films during SCLC test since HTMs used in PSCs were not annealed. The thickness of HTM was around 100 nm. The thickness of films was measured from the stylus profiler (Dektak XT, Bruker) with a vertical resolution of 1 Å. We first measured the thickness of PEDOT:PSS and determined the thickness of HTM films by the average of 5 test results. The charge mobilities were determined by fitting the dark current according to the following equation:

$$J(V) = \frac{9V^2}{8L^3} \varepsilon_0 \varepsilon_r \mu_0 e^{(0.89V\sqrt{V/L})}$$

Where  $J$  is the dark current density ( $\text{mA cm}^{-2}$ ),  $\mu_0$  is the zero-field mobility ( $\text{cm}^2 \text{V}^{-1} \text{s}^{-1}$ ),  $\varepsilon_0$  is the permittivity of free space,  $\varepsilon_r$  is the relative permittivity of the material,  $V$  is the effective voltage ( $V = V_{\text{Applied}} - V_{\text{Built-in}} - V_{\text{series resistance}}$ ), and  $L$  is the thickness of the active layer.

## 2. Synthesis

Commercially available reagents were purchased from Energy or Admas and used without further purification. Toluene and tetrahydrofuran (THF) were freshly distilled before use. Other solvents were used directly.

### Synthesis of BDD-T

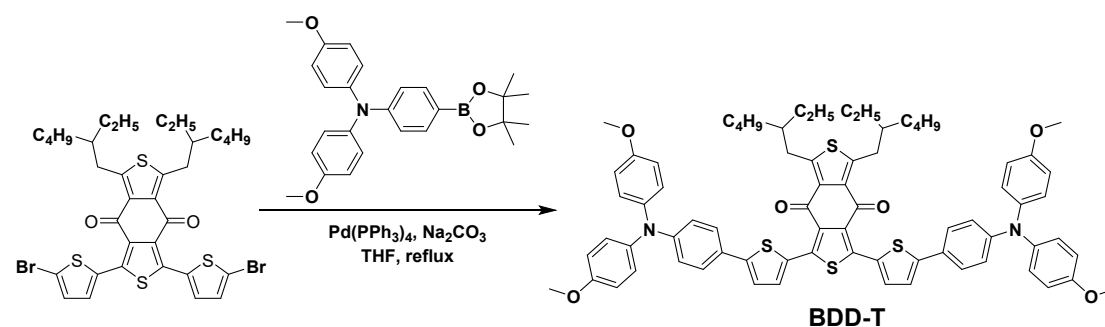

**Scheme S1.** Synthetic route of **BDD-T**

### BDD-T

1,3-Bis(5-bromothiophen-2-yl)-5,7-bis(2-ethylhexyl)benzo[1,2-c:4,5-c']dithiophene-4,8-dione and 4-methoxy-N-(4-methoxyphenyl)-N-(4-(4,4,5,5-tetramethyl-1,3,2-dioxaborolan-2-yl)phenyl)aniline were synthesized according to literatures.<sup>2,3</sup>

1,3-Bis(5-bromothiophen-2-yl)-5,7-bis(2-ethylhexyl)benzo[1,2-c:4,5-c']dithiophene-4,8-dione (0.30 g, 0.39 mmol), 4-methoxy-N-(4-methoxyphenyl)-N-(4-(4,4,5,5-tetramethyl-1,3,2-dioxaborolan-2-yl)phenyl)aniline (0.51 g, 1.17 mmol) and Pd(PPh<sub>3</sub>)<sub>4</sub> (45 mg, 0.04 mmol) were placed in a round-bottomed flask. THF (20 mL, degassed with nitrogen) and Na<sub>2</sub>CO<sub>3</sub> solution (3.9 mL, 2.0 M, degassed with nitrogen) were added. The mixture was refluxed for 48 h. After cooling to room temperature, the mixed solution was extracted with CH<sub>2</sub>Cl<sub>2</sub>, washed with water, dried and evaporated under vacuum. **BDD-T** (0.48 g, 82%) was obtained by column chromatography on silica gel using petroleum ether/ethyl acetate, 5:1, v/v. <sup>1</sup>H NMR (500 MHz, CDCl<sub>3</sub>, δ): 7.78 (d, *J* = 4.0 Hz, 2H), 7.47 (d, *J* = 8.6 Hz, 4H), 7.18 (s, 2H), 7.14 – 7.04 (m, 8H), 6.92 (d, *J* = 8.7 Hz, 4H), 6.90 – 6.80 (m, 8H), 3.81 (s, 12H), 3.33 (d, *J* = 7.1 Hz, 4H), 1.77 (s, 2H), 1.44 – 1.26 (m, 16H), 0.90 (m, 12H). <sup>13</sup>C NMR (125 MHz, CDCl<sub>3</sub>, δ): 177.70, 156.14, 153.02, 148.74, 148.27, 142.31, 140.47, 133.19, 132.00, 131.84, 131.45, 126.84, 126.70, 125.82, 122.00, 120.14, 114.78, 55.49, 41.22, 33.64, 32.81, 28.87, 26.03, 23.03, 14.14, 10.90. MALDI-TOF MS: *m/z*=1214.4415 [M]<sup>+</sup>, calcd. for C<sub>74</sub>H<sub>74</sub>N<sub>2</sub>O<sub>6</sub>S<sub>4</sub>: 1214.4430. Elemental analysis: calcd. for C<sub>74</sub>H<sub>74</sub>N<sub>2</sub>O<sub>6</sub>S<sub>4</sub>: C 73.11, H 6.14, N 2.30, S 10.55; found: C 72.68, H 6.03, N 1.82, S 11.07.

### Synthesis of BTT-T

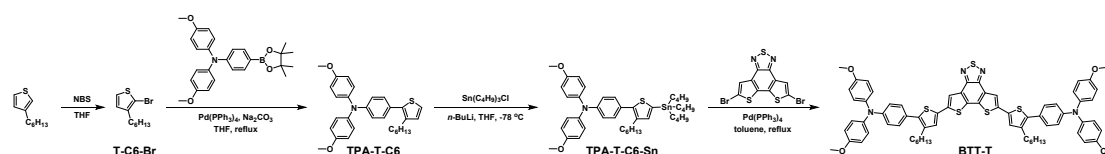

**Scheme S2.** Synthetic route of **BTT-T**

### T-C6-Br

3-Hexylthiophene (5.00 g, 29.71 mmol) was dissolved in 50 mL THF. N-Bromosuccinimide (5.29 g, 29.71 mmol) was added in portions in dark at 0 °C. The mixed solution was stirred overnight and quenched with water. The crude mixture was extracted with CH<sub>2</sub>Cl<sub>2</sub>, washed with water, the combined organic phase was dried over by MgSO<sub>4</sub> and concentrated in vacuo. The residue was purified by column chromatography (petroleum ether) to afford **T-C6-Br** as colorless oil (7.00 g, 95%).

<sup>1</sup>H NMR (500 MHz, CDCl<sub>3</sub>, δ): 7.18 (d, *J* = 5.4 Hz, 1H), 6.80 (d, *J* = 5.4 Hz, 1H), 2.56 (ddt, *J* = 8.4, 5.3, 2.6 Hz, 2H), 1.41 – 1.16 (m, 8H), 0.98 – 0.77 (m, 3H).

### TPA-T-C6

**T-C6-Br** (2.39 g, 9.69 mmol), 4-methoxy-N-(4-methoxyphenyl)-N-(4-(5-(tributylstannyl)thiophen-2-yl)phenyl)aniline (3.50 g, 8.07 mmol) and Pd(PPh<sub>3</sub>)<sub>4</sub> (19 mg, 0.02 mmol) and Pd(PPh<sub>3</sub>)<sub>4</sub> (932.90 mg, 0.81 mmol) were placed in a round-bottomed flask. THF (100 mL, degassed with nitrogen) and Na<sub>2</sub>CO<sub>3</sub> solution (26.9 mL, 3.0 M, degassed with nitrogen) were added. The mixture was refluxed for 48 h. After cooling to room temperature, the mixed solution was extracted with CH<sub>2</sub>Cl<sub>2</sub>, washed with water, dried and evaporated under vacuum. **TPA-T-C6** (3.10 g, 81%) was obtained by column chromatography on silica gel using petroleum ether/ethyl acetate, 20:1, v/v. <sup>1</sup>H NMR (500 MHz, CDCl<sub>3</sub>, δ): 7.23 (s, 2H), 7.10 (t, *J* = 17.4 Hz, 5H), 6.95 (d, *J* = 5.2 Hz, 2H), 6.85 (d, *J* = 8.3 Hz, 5H), 3.81 (s, 6H), 2.64 (s, 2H), 1.37 – 1.21 (m, 8H), 0.96 – 0.73 (m, 3H).

### TPA-T-C6-Sn

To a solution of **TPA-T-C6** (1.00 g, 2.12 mmol) in 30 mL dry THF cooled at -78 °C was added dropwise with n-butyllithium (2.5 M in hexanes, 1.02 mL, 2.54 mmol) under N<sub>2</sub>. After complete addition, the reaction was stirred at -78 °C for 1 h. After warming to room temperature, the solution was stirred for another 1 h, and then cooled again to -78 °C, tributyltin chloride (0.83 g, 2.54 mmol) was added. The mixture was warmed to room temperature and stirred overnight. The reaction mixture was quenched with water and extracted with CH<sub>2</sub>Cl<sub>2</sub>. The extract was washed with water and the combined organic phases were dried over Na<sub>2</sub>SO<sub>4</sub>. **TPA-T-C6-Sn** (2.50 g, 91%) was obtained as brown oil and used in the next reaction without further purification.

### BTT-T

5,8-Dibromodithieno[3',2':3,4;2'',3'':5,6]benzo[1,2-c][1,2,5]thiadiazole was synthesized according to literature.<sup>4</sup>

5,8-Dibromodithieno[3',2':3,4;2'',3'':5,6]benzo[1,2-c][1,2,5]thiadiazole (0.50 g, 1.23 mmol), **TPA-T-C6-Sn** (2.06 g, 2.71 mmol) and Pd(PPh<sub>3</sub>)<sub>4</sub> (142.27 mg, 0.12 mmol) were placed in a round-bottomed flask. Toluene (10 mL, degassed with nitrogen) was added. The mixture was refluxed for 48 h. After cooling to room temperature, the mixed solution was extracted with CH<sub>2</sub>Cl<sub>2</sub>, washed with water, dried and evaporated under vacuum. **BTT-T** (1.21 g, 83%) was obtained by column chromatography on silica gel

using petroleum ether/ethyl acetate, 4:1, v/v.  $^1\text{H}$  NMR (500 MHz,  $\text{CDCl}_3$ ,  $\delta$ ): 7.98 (s, 2H), 7.27 (s, 4H), 7.21 (s, 4H), 7.10 (s, 6H), 6.87 (s, 12H), 3.82 (s, 12H), 2.67 (s, 4H), 1.73 – 1.59 (m, 4H), 1.40 – 1.24 (m, 12H), 0.90 (t,  $J = 6.4$  Hz, 6H).  $^{13}\text{C}$  NMR (125 MHz,  $\text{CDCl}_3$ ,  $\delta$ ): 156.14, 150.18, 148.28, 140.54, 138.97, 138.92, 137.59, 133.23, 133.15, 129.59, 129.39, 127.53, 126.95, 125.54, 119.66, 118.76, 114.79, 55.49, 31.68, 30.92, 29.28, 28.93, 22.64, 14.14. MALDI-TOF MS:  $m/z=1186.3673$   $[\text{M}]^+$ , calcd. for  $\text{C}_{70}\text{H}_{66}\text{N}_4\text{O}_4\text{S}_5$ : 1186.3688. Elemental analysis: calcd. for  $\text{C}_{70}\text{H}_{66}\text{N}_4\text{O}_4\text{S}_5$ : C 70.79, H 5.60, N 4.72, S 13.50; found: C 70.09, H 5.54, N 4.49, S 13.87.

### 3. Device fabrication

#### *Solution preparation:*

$\text{MA}_{0.7}\text{FA}_{0.3}\text{PbI}_3$  precursor: 1 mmol  $\text{PbI}_2$  (Alfa Aesar), 0.7 mmol methylammonium iodide (MAI, Dyesol), 0.3 mmol formamidinium iodide (FAI, Dyesol) and 9.22 mg  $\text{Pb}(\text{SCN})_2$  (Sigma-Aldrich, 99.5%) were added to 600  $\mu\text{L}$   $N,N$ -dimethylformamide (DMF, Sigma-Aldrich), then 1 mmol dimethyl sulfoxide (DMSO, Sigma-Aldrich) was added. The precursor solution was stirred on a hotplate at 60  $^\circ\text{C}$  for 1 h and then purified using a 0.45  $\mu\text{m}$  filter before deposition.

$\text{C}_{60}$ -SAM:  $\text{C}_{60}$ -SAM (Sigma-Aldrich, 99.8%) was dissolved in chlorobenzene (CB) with a concentration of 4  $\text{mg mL}^{-1}$ .

PEAI: A solution of PEA (2  $\text{mg mL}^{-1}$  in isopropanol, Sigma Aldrich) was purified using a 0.45  $\mu\text{m}$  filter before deposition.

BDD-T/BTT-T: A solution of BDD-T/BTT-T (15  $\text{mg mL}^{-1}$  in CB) was stirred on a hotplate at 50  $^\circ\text{C}$  for 1 h and then purified using a 0.45  $\mu\text{m}$  filter before deposition.

Spiro-OMeTAD: The spiro-OMeTAD solution was prepared by dissolving 72.3 mg spiro-OMeTAD (Shenzhen Feiming Science and Technology Co., Ltd.) in 1 mL CB with 28  $\mu\text{L}$   $t$ -BP (Sigma-Aldrich) and 18  $\mu\text{L}$  Li-TFSI (520  $\text{mg mL}^{-1}$  in acetonitrile, Sigma-Aldrich). The solution was stirred on a hotplate at 60  $^\circ\text{C}$  for 24 h and then purified using a 0.45  $\mu\text{m}$  filter before deposition.

#### *Device fabrication:*

The FTO substrates were sequentially cleaned by ultra-sonication with diluted Micro-90 detergent, deionized water, acetone, and isopropanol for 30 min, respectively.  $\text{SnO}_2$  layer was deposited on the FTO from a pre-synthesized QD solution.<sup>5</sup> The  $\text{SnO}_2$  layer was annealed at 200  $^\circ\text{C}$  for 1 h in ambient air. The  $\text{C}_{60}$ -SAM solution was then spin-coated onto  $\text{SnO}_2$  layer at 3000 rpm for 1 min. The perovskite precursor solution was

spin-coated at 500 rpm for 3 s and at 4000 rpm for 60 s, 700  $\mu\text{L}$  diethyl ether was then dropped onto the perovskite surface at 55s before end in one portion. After spin-coating, the perovskite film was annealed at 100  $^{\circ}\text{C}$  for 5 min. All these processes were carried out in a  $\text{N}_2$  filled glove box. The PEAI layer was spin-coated on the top of the perovskite film at a speed of 5000 rpm for 30 s. The HTM layer was spin-coated on the perovskite film at 3000 rpm for 60 s. All HTM films are fabricated without thermal annealing. A layer of 100 nm gold (Au) was then deposited on the top of HTM using thermal evaporation. The working area of the devices was 0.04  $\text{cm}^2$  as defined by a shadow mask during the Au evaporation.

#### 4. $^1\text{H}$ NMR, $^{13}\text{C}$ NMR and MALDI-TOF MS spectra

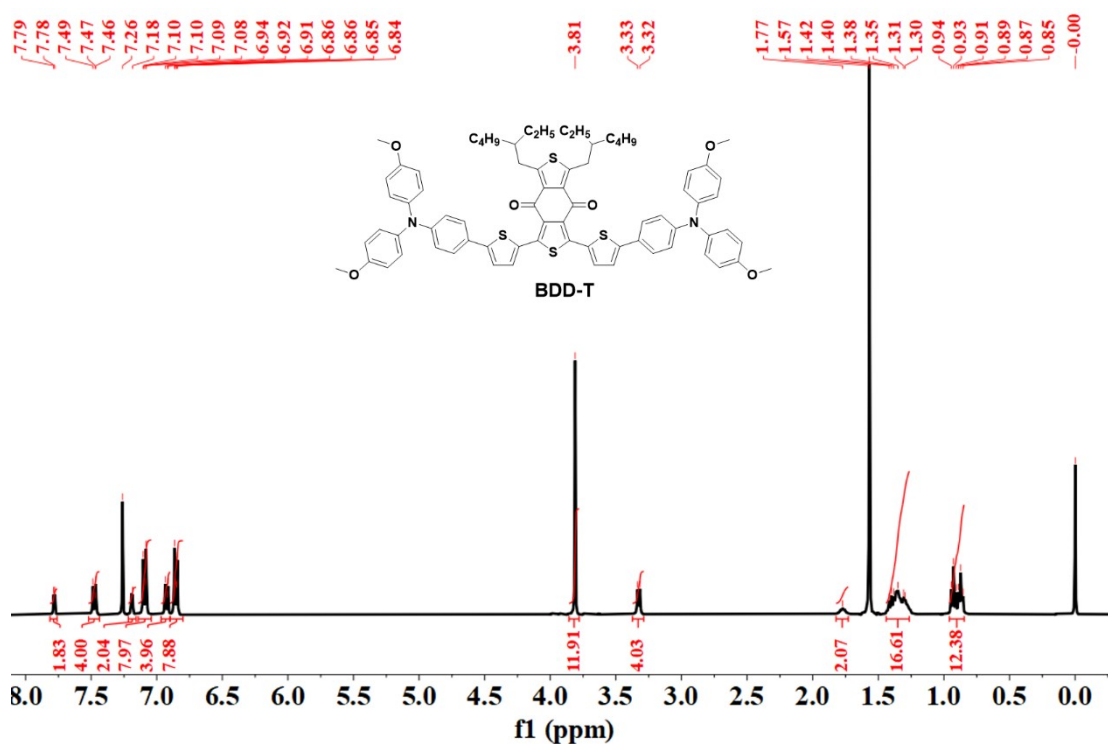

Fig. S1  $^1\text{H}$  NMR spectrum of compound BDD-T.

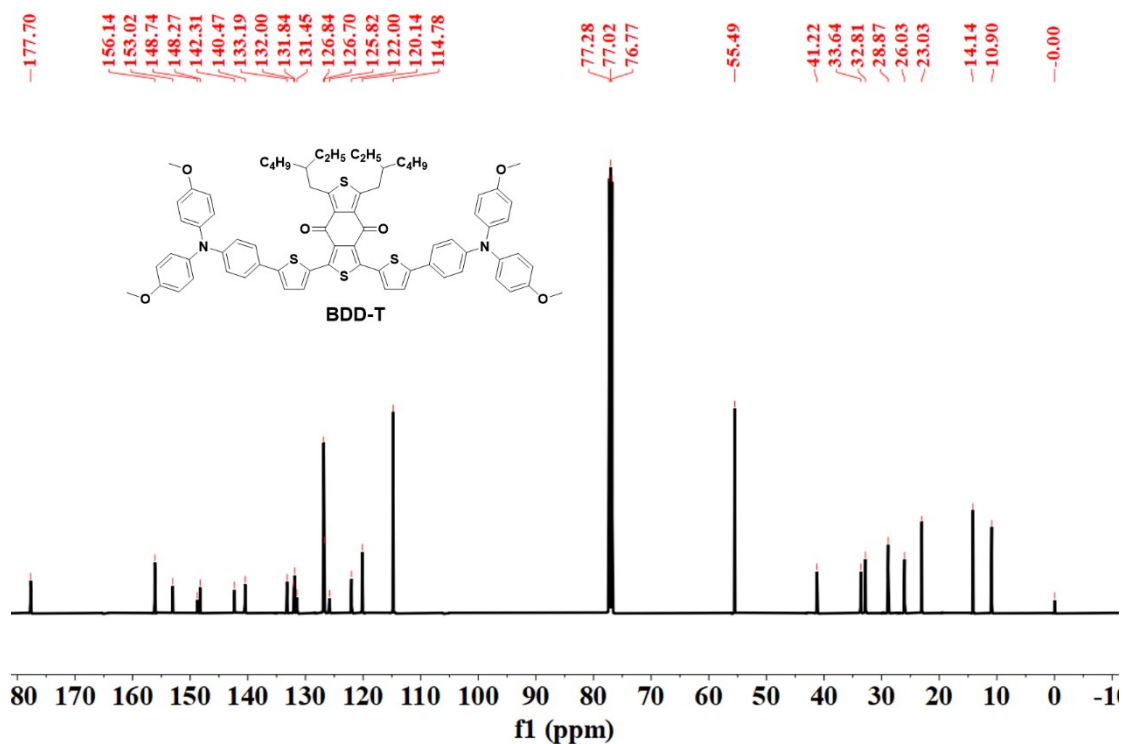

Fig. S2  $^{13}\text{C}$  NMR spectrum of compound BDD-T.

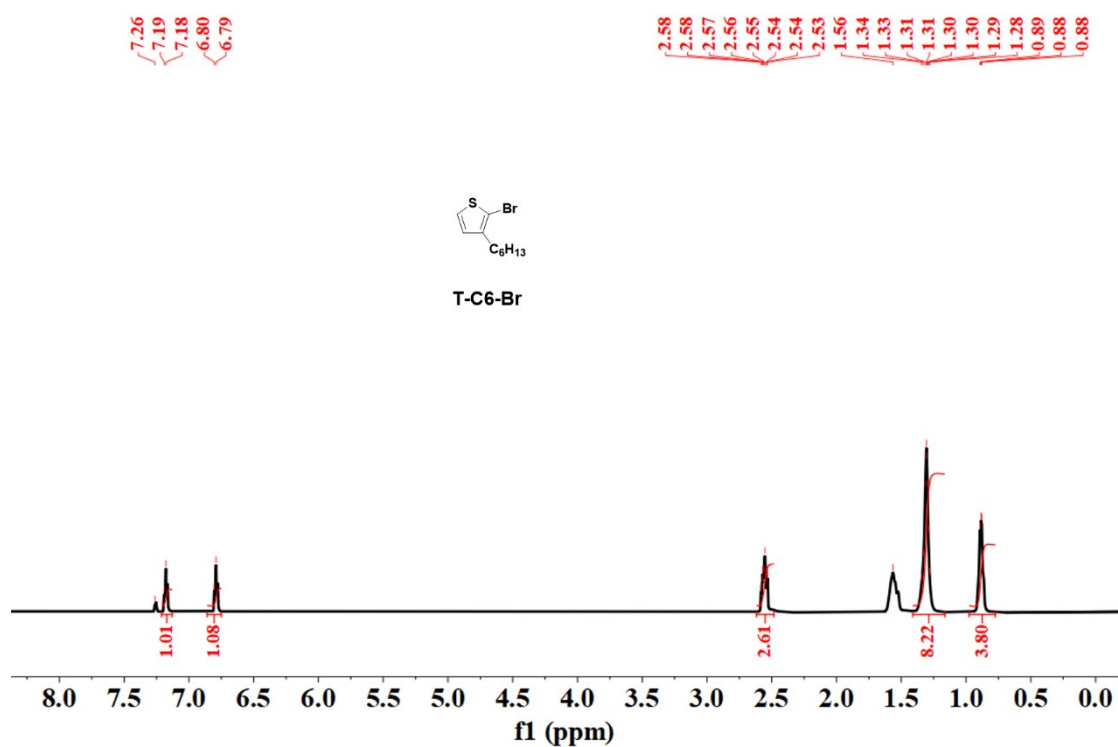

Fig. S3  $^1\text{H}$  NMR spectrum of compound T-C6Br.



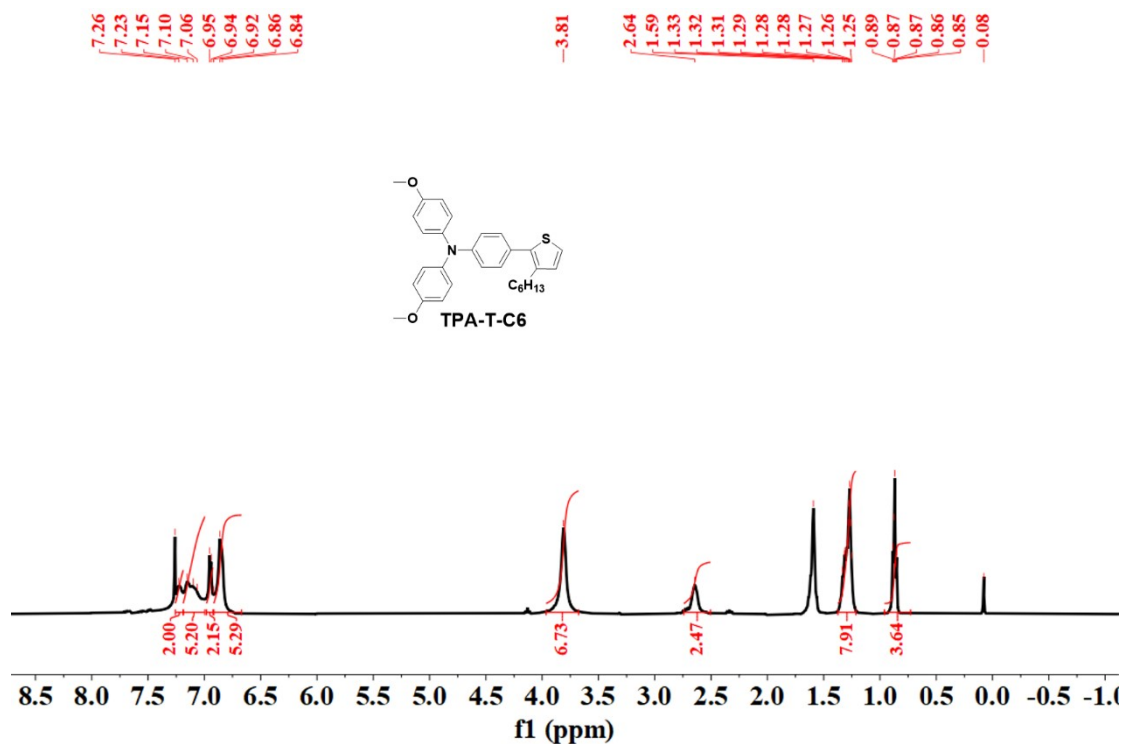

Fig. S4 <sup>1</sup>H NMR spectrum of compound TPA-T-C6.

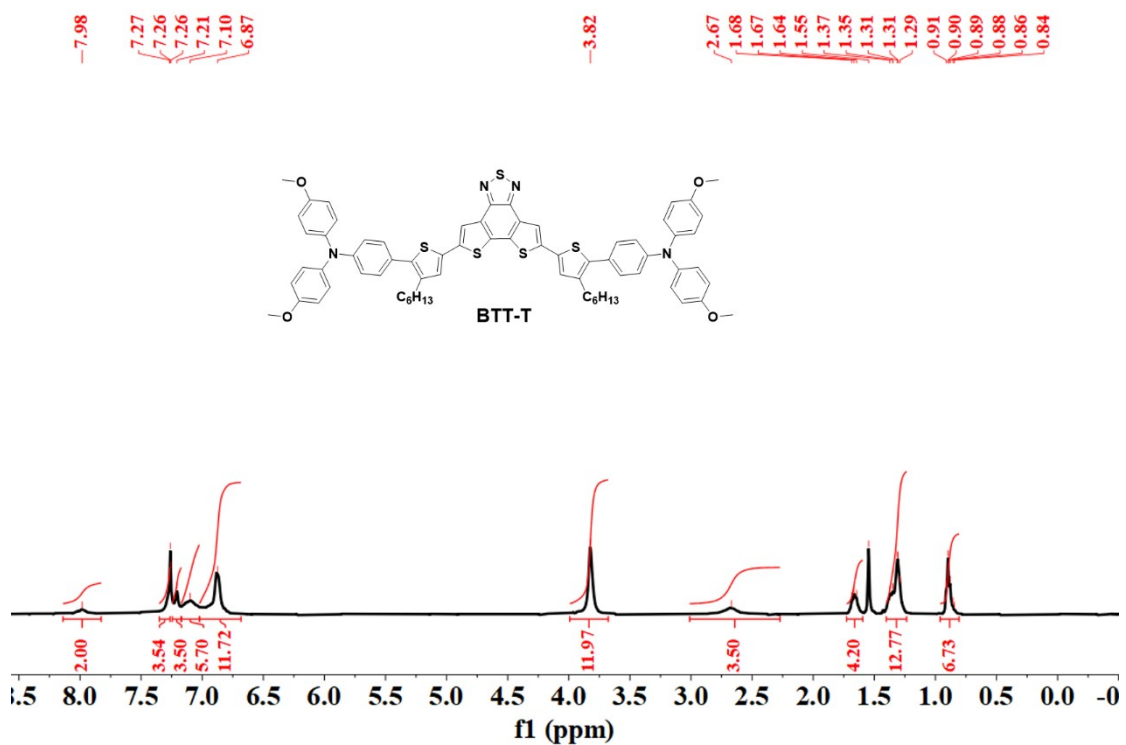

Fig. S5 <sup>1</sup>H NMR spectrum of compound BTT-T.

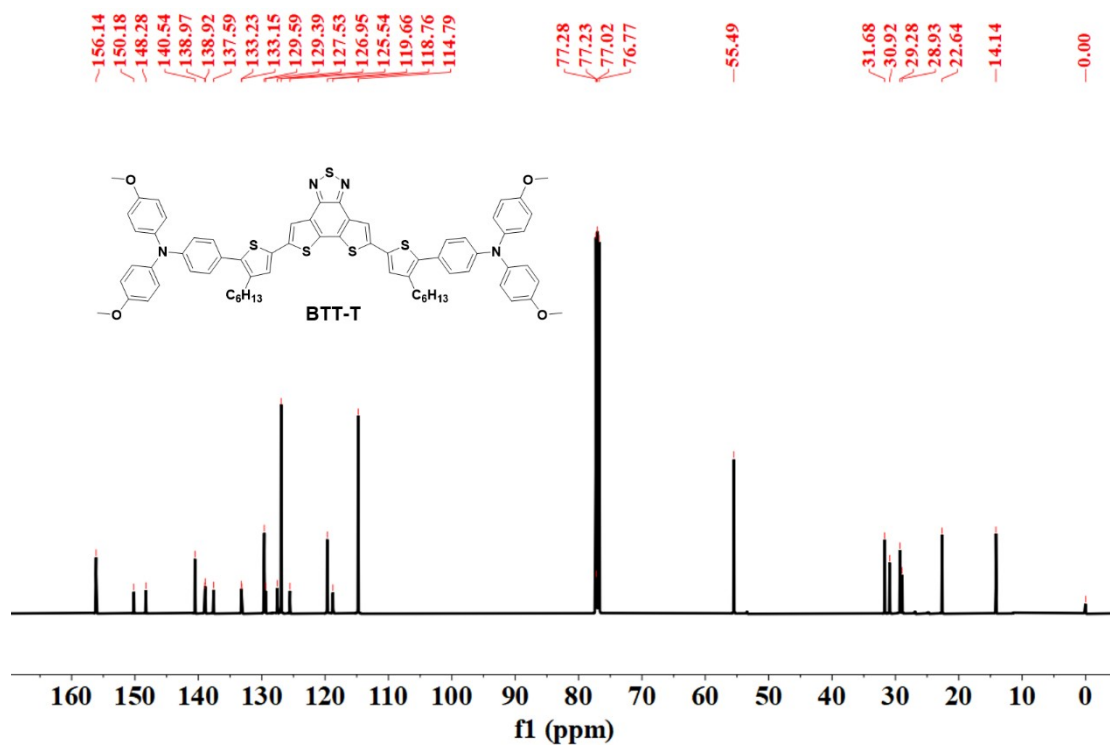

Fig. S6 <sup>13</sup>C NMR spectrum of compound BTT-T.

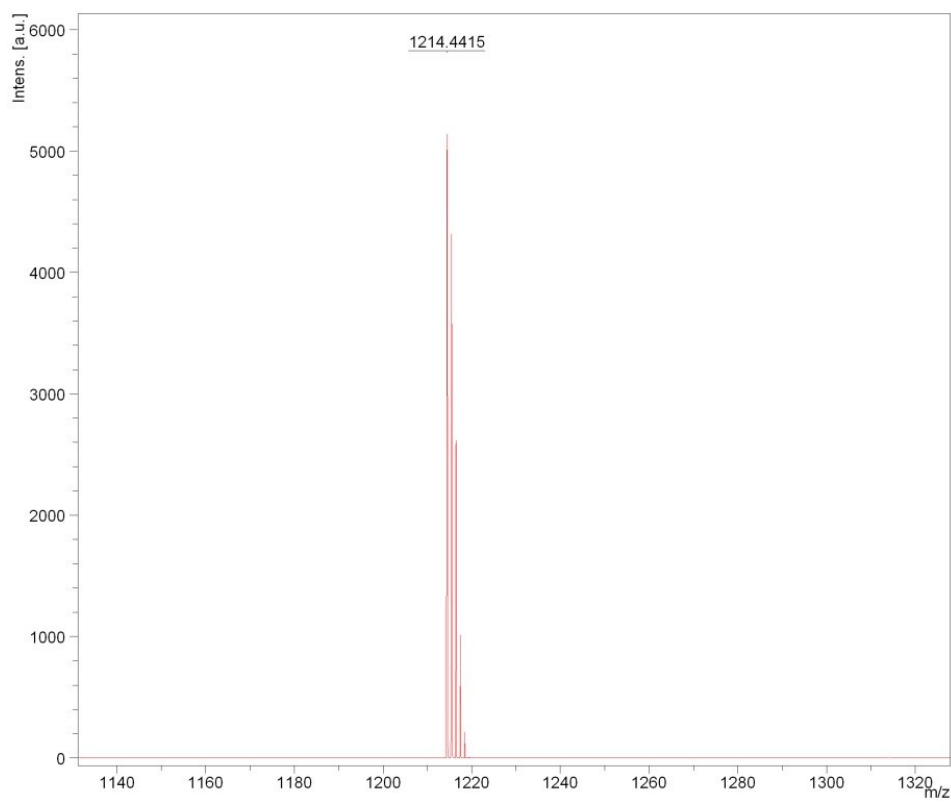

**Fig. S7** MADLI-TOF mass spectrometry of **BDD-T**.

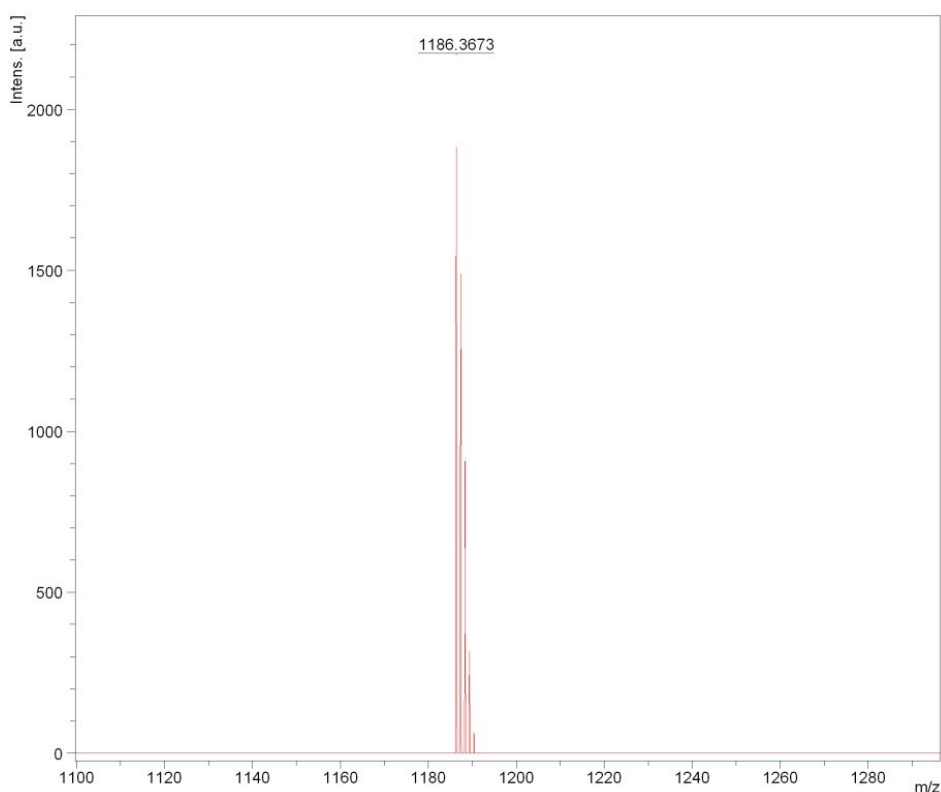

**Fig. S8** MADLI-TOF mass spectrometry of **BTT-T**.

## 5. DFT calculation

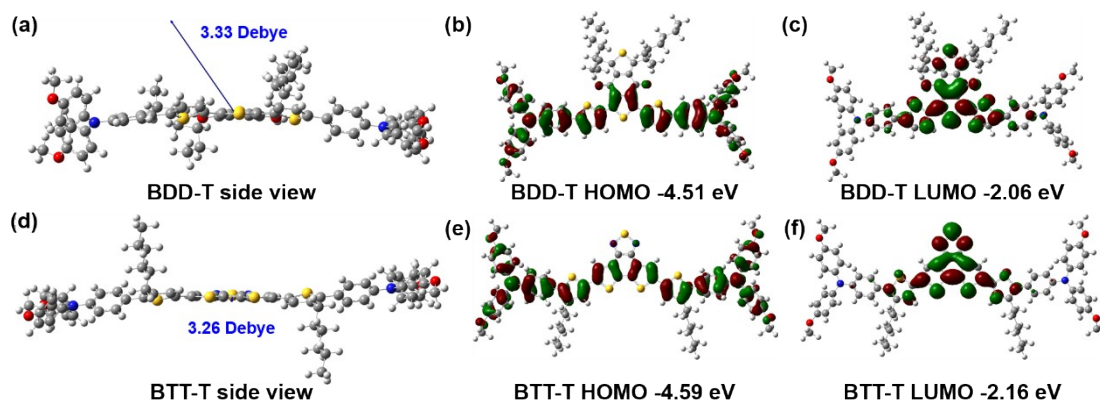

**Fig. S9** DFT calculated geometries and frontier orbitals of BDD-T: (a) side view geometry and total dipole moment, (b) HOMO and (c) LUMO delocalization. DFT calculated geometries and frontier orbitals of BTT-T: (d) side view geometry and total dipole moment, (e) HOMO and (f) LUMO delocalization.

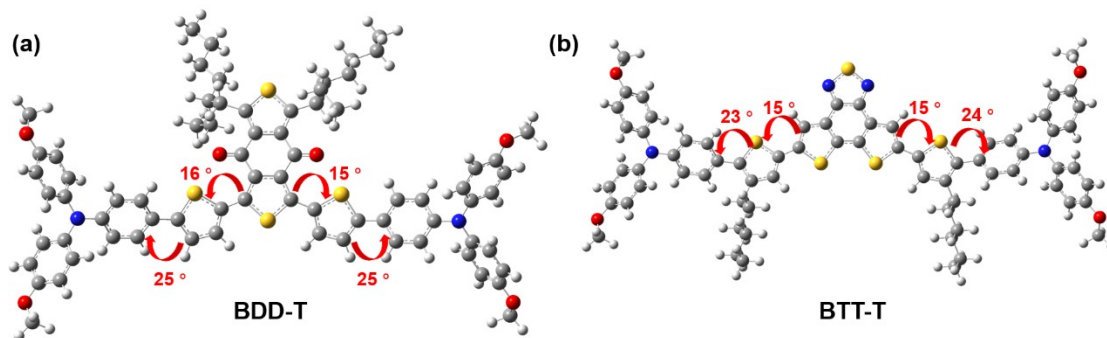

**Fig. S10** DFT calculated geometries (top view) and dihedral angles of (a) BDD-T and (b) BTT-T.

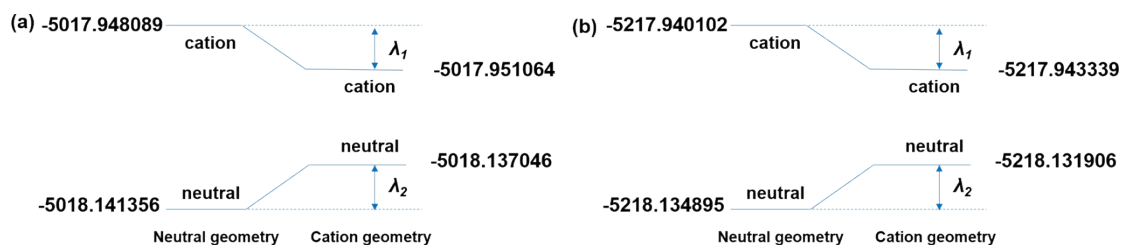

BDD-T:  $\lambda_{hole} = \lambda_1 + \lambda_2 = 0.0073$  hartree = **198 meV**    BTT-T:  $\lambda_{hole} = \lambda_1 + \lambda_2 = 0.0062$  hartree = **169 meV**

**Fig. S11** DFT calculated hole reorganization energies of (a) BDD-T and (b) BTT-T.

## 6. CV, AFM, SEM and water contact angle results

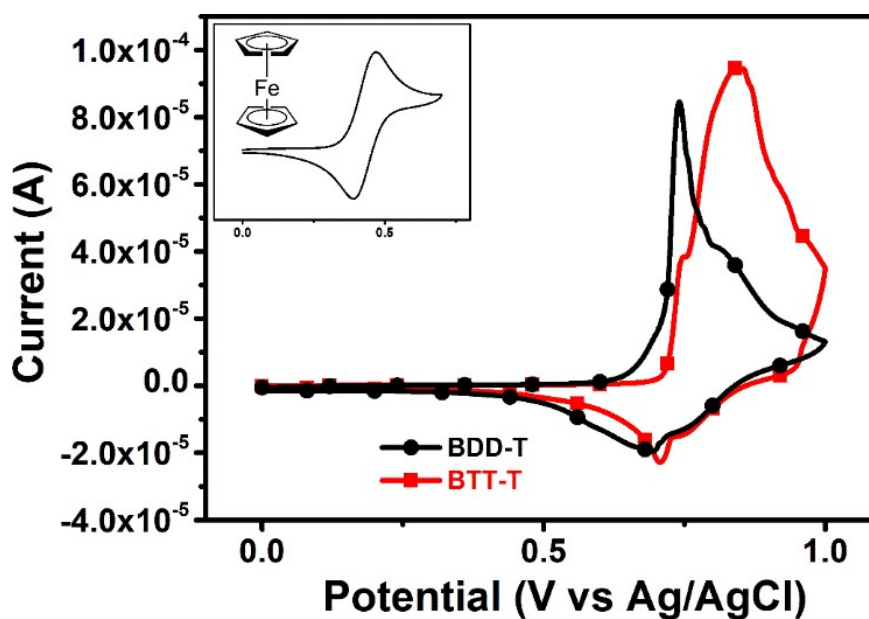

**Fig. S12** CV plots of BDD-T and BTT-T. The inset is the CV plot of ferrocene/ferrocenium standard.

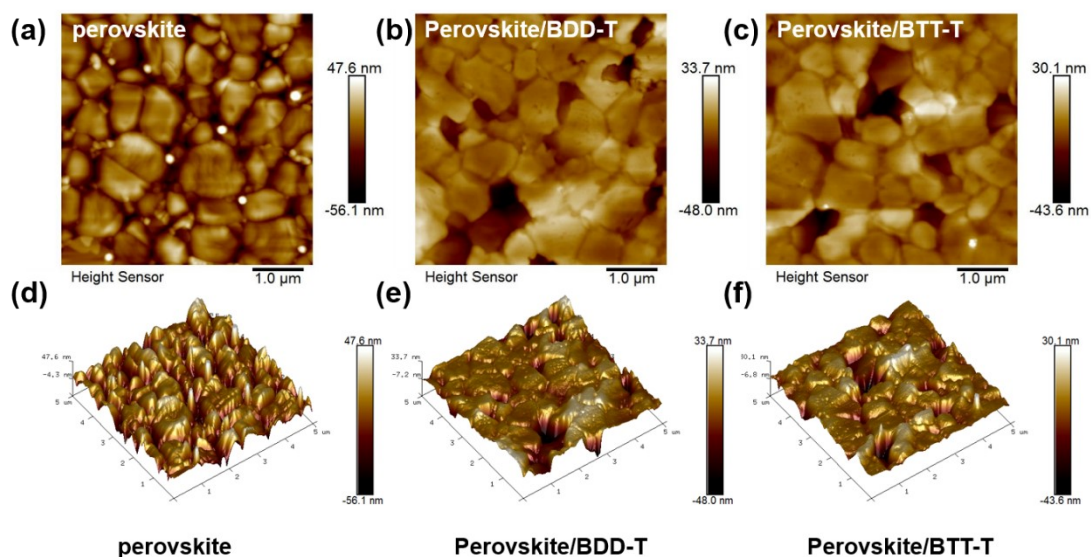

**Fig. S13** AFM 2D images of (a) bare perovskite and perovskite covered with (b) BDD-T and (c) BTT-T films. AFM 3D images of (d) bare perovskite and perovskite covered with (e) BDD-T and (f) BTT-T films. The surface roughness with root-mean-square (RMS) of perovskite, perovskite/BDD-T and perovskite/BTT-T are 14.6, 10.2 and 8.7 nm, respectively.

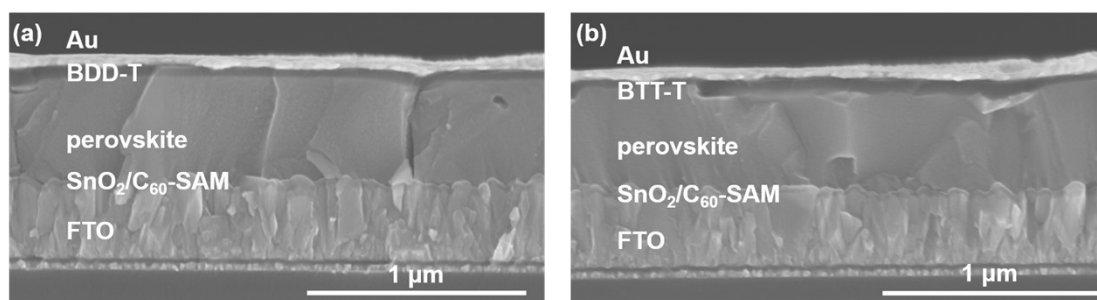

**Fig. S14** Cross-sectional SEM image of PSCs with (a) BDD-T and (b) BTT-T HTMs. The estimated thicknesses of BDD-T and BTT-T are 57 and 62 nm.

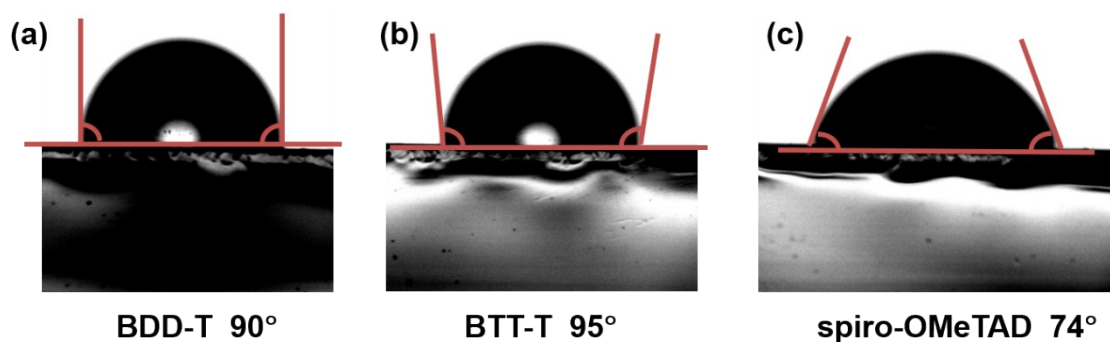

**Fig. S15** Water contact angles of perovskite covered with (a) BDD-T, (b) BTT-T and (c) doped spiro-OMeTAD films.

## 7. Device parameters

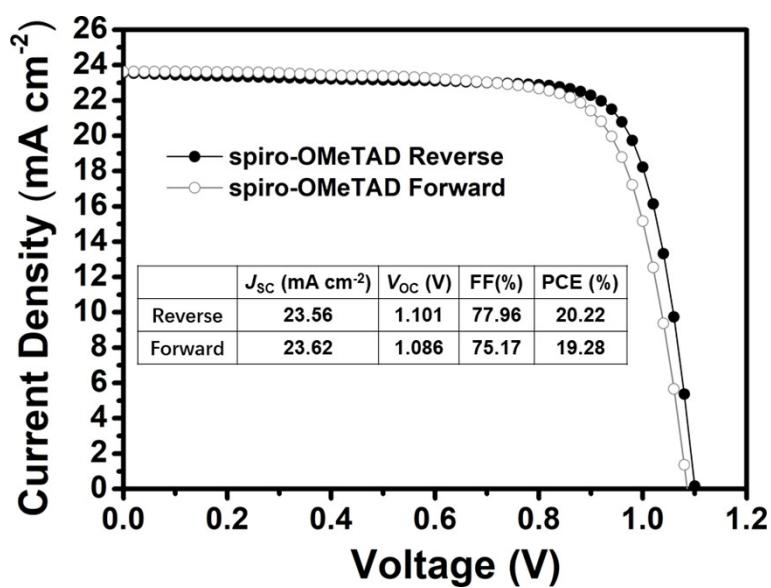

**Fig. S16**  $J$ - $V$  curves of doped spiro-OMeTAD-based PSCs measured under reverse and forward voltage scan. The inset is the summary of photovoltaic parameters.

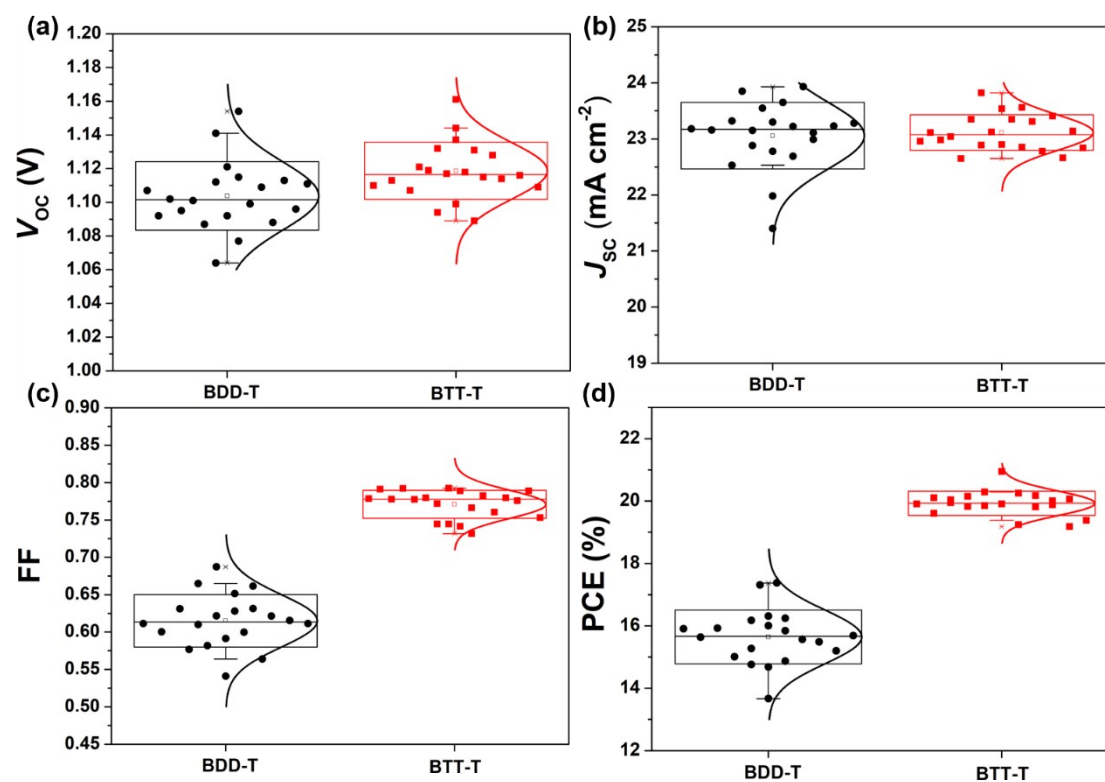

**Fig. S17** Photovoltaic parameters of 20 individual PSCs with BDD-T and BTT-T as HTMs. Histograms of (a)  $V_{OC}$ , (b)  $J_{SC}$ , (c) FF, and (d) PCE of corresponding devices.

**Table S1** Photovoltaic parameters for PSCs with BDD-T and BTT-T as HTMs.

| HTM               | $J_{sc}$<br>(mA cm <sup>-2</sup> ) | $V_{oc}$<br>(V) | FF            | PCE<br>(%) |
|-------------------|------------------------------------|-----------------|---------------|------------|
| <b>BDD-T</b>      | 23.06±0.24                         | 1.104±0.01      | 0.6150±0.0129 | 15.64±0.67 |
|                   |                                    | 1               |               |            |
| BDD-T<br>champion | 23.30                              | 1.115           | 0.6279        | 16.31      |
| <b>BTT-T</b>      | 23.11±0.24                         | 1.119±0.01      | 0.7709±0.0180 | 19.93±1.01 |
|                   |                                    | 8               |               |            |
| BTT-T champion    | 23.35                              | 1.137           | 0.7889        | 20.94      |

## 8. A summary of representative D-A-D type HTMs

**Table S2** A summary of representative D-A-D type HTMs for n-i-p PSCs.

| HTM          | Dopant-free | $J_{sc}$<br>(mA cm <sup>-2</sup> ) | $V_{oc}$<br>(V) | FF            | PCE<br>(%)   | Ref.             |
|--------------|-------------|------------------------------------|-----------------|---------------|--------------|------------------|
| <b>BTT-T</b> | <b>Yes</b>  | <b>23.35</b>                       | <b>1.137</b>    | <b>0.7889</b> | <b>20.94</b> | <b>This work</b> |
| Y-T          | Yes         | 22.90                              | 1.118           | 0.7925        | 20.29        | 6                |
| YN2          | Yes         | 22.87                              | 1.11            | 0.75          | 19.27        | 7                |
| TQ4          | Yes         | 23.71                              | 1.124           | 0.79          | 21.03        | 8                |
| BTF4         | Yes         | 22.5                               | 1.06            | 0.756         | 18.03        | 9                |
| FBA3         | Yes         | 22.12                              | 1.09            | 0.799         | 19.27        | 10               |
| DT-BT        | Yes         | 16.8                               | 0.83            | 0.522         | 7.3          | 11               |
| ACE-QA-ACE   | Yes         | 22.41                              | 1.06            | 0.77          | 18.2         | 12               |
| TQ2          | No          | 22.55                              | 1.12            | 0.7767        | 19.62        | 13               |
| JY6          | No          | 21.39                              | 1.066           | 0.81          | 18.54        | 14               |
| JY8          | No          | 21.94                              | 1.08            | 0.81          | 19.14        | 15               |

## 9. References

1. L. Guan, X. Yin, D. Zhao, C. Wang, Q. An, J. Yu, N. Shrestha, C. Grice, R. Awni, Y. Yu, Z. Song, J. Zhou, W. Meng, F. Zhang, R. Ellingson, J. Wang, W. Tang and Y. Yan, *J. Mater. Chem. A*, 2017, **5**, 23319-23327.
2. D. Qian, L. Ye, M. Zhang, Y. Liang, L. Li, Y. Huang, X. Guo, S. Zhang, Z. a. Tan and J. Hou, *Macromolecules*, 2012, **45**, 9611-9617.
3. X. Yin, L. Guan, J. Yu, D. Zhao, C. Wang, N. Shrestha, Y. Han, Q. An, J. Zhou, B. Zhou, Y. Yu, C. R. Grice, R. A. Awni, F. Zhang, J. Wang, R. J. Ellingson, Y. Yan and W. Tang, *Nano Energy*, 2017, **40**, 163-169.
4. J. Lee, D. H. Sin, J. A. Clement, C. Kulshreshtha, H. G. Kim, E. Song, J. Shin, H. Hwang and K. Cho, *Macromolecules*, 2016, **49**, 9358-9370.
5. G. Yang, C. Chen, F. Yao, Z. Chen, Q. Zhang, X. Zheng, J. Ma, H. Lei, P. Qin, L. Xiong, W. Ke, G. Li, Y. Yan and G. Fang, *Adv. Mater.*, 2018, **30**, 1706023.
6. J. Hai, H. Wu, X. Yin, J. Song, L. Hu, Y. Jin, L. Li, Z. Su, Z. Xu, H. Wang and Z. Li, *Adv. Funct. Mater.*, 2021, **31**, 2105458.
7. P. Xu, P. Liu, Y. Li, B. Xu, L. Kloo, L. Sun and Y. Hua, *ACS Appl. Mater. Interfaces*, 2018, **10**, 19697-

- 19703.
8. H. Guo, H. Zhang, C. Shen, D. Zhang, S. Liu, Y. Wu and W.-H. Zhu, *Angew. Chem., Int. Ed.*, 2021, **60**, 2674-2679.
  9. X. Sun, Q. Xue, Z. Zhu, Q. Xiao, K. Jiang, H.-L. Yip, H. Yan and Z. a. Li, *Chem. Sci.*, 2018, **9**, 2698-2704.
  10. X. Sun, F. Wu, C. Zhong, L. Zhu and Z. a. Li, *Chem. Sci.*, 2019, **10**, 6899-6907.
  11. T. Niu, W. Zhu, Y. Zhang, Q. Xue, X. Jiao, Z. Wang, Y.-M. Xie, P. Li, R. Chen, F. Huang, Y. Li, H.-L. Yip and Y. Cao, *Joule*, 2021, **5**, 249-269.
  12. H. D. Pham, S. M. Jain, M. Li, S. Manzhos, K. Feron, S. Pitchaimuthu, Z. Liu, N. Motta, H. Wang, J. R. Durrant and P. Sonar, *J. Mater. Chem. A*, 2019, **7**, 5315-5323.
  13. H. Zhang, Y. Wu, W. Zhang, E. Li, C. Shen, H. Jiang, H. Tian and W. Zhu, *Chem. Sci.*, 2018, **9**, 5919-5928.
  14. F. Wu, Y. Ji, C. Zhong, Y. Liu, L. Tan and L. Zhu, *Chem. Commun.*, 2017, **53**, 8719-8722.
  15. Y. Ji, B. He, H. Lu, J. Xu, R. Wang, Y. Jin, C. Zhong, Y. Shan, F. Wu and L. Zhu, *ChemSusChem*, 2019, **12**, 1374-1380.
